# Supplementary material for: Radiolysis of water in nanoporous gold
Source: Royal Society of Chemistry journal article supplement (doi:10.1039/c0cp00967a), 2010-01-01
Supplement: c0cp00967a.pdf [file c0cp00967a.pdf]

## Supplementary material

### **Radiolysis of water in nanoporous gold.**

R. Musat <sup>a,b</sup>, S. Moreau <sup>a,b</sup>, F. Poidevin <sup>a</sup>, M.H. Mathon <sup>c</sup>,  
S. Pommeret <sup>a,b</sup> et J.P. Renault <sup>a,b</sup>

**a)** CEA, IRAMIS, Laboratoire de Radiolyse, 91191 Gif-sur-Yvette Cedex, France.

**b)** CNRS, URA 3299, 91191 Gif-sur-Yvette Cedex, France.

**c)** LLB, UMR 12 CEA-CNRS. 91191 Gif-sur-Yvette Cedex, FRANCE

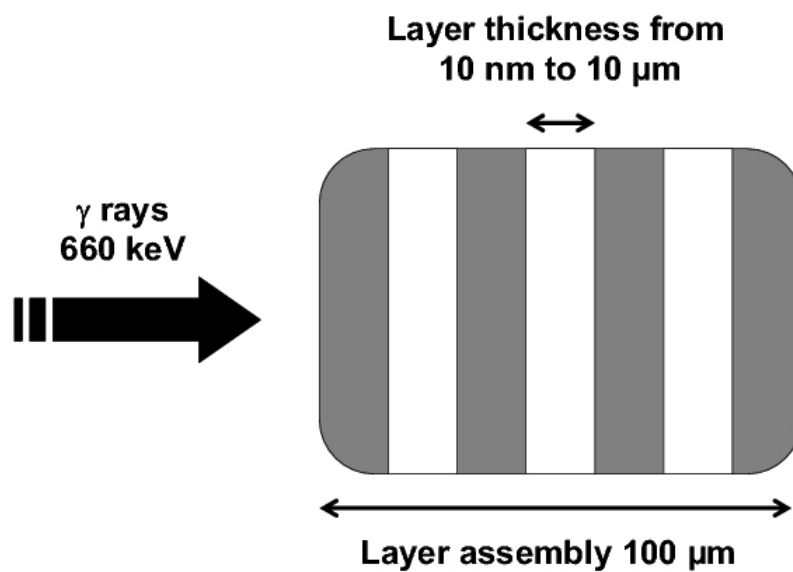

Figure S1: *Schematic description of the nanostructure water/material assembly used in the PENELOPE simulations. The water and material layers are of equal thickness, and their assembly is embedded in a homogeneous water material mixture to insure an electronic equilibrium*

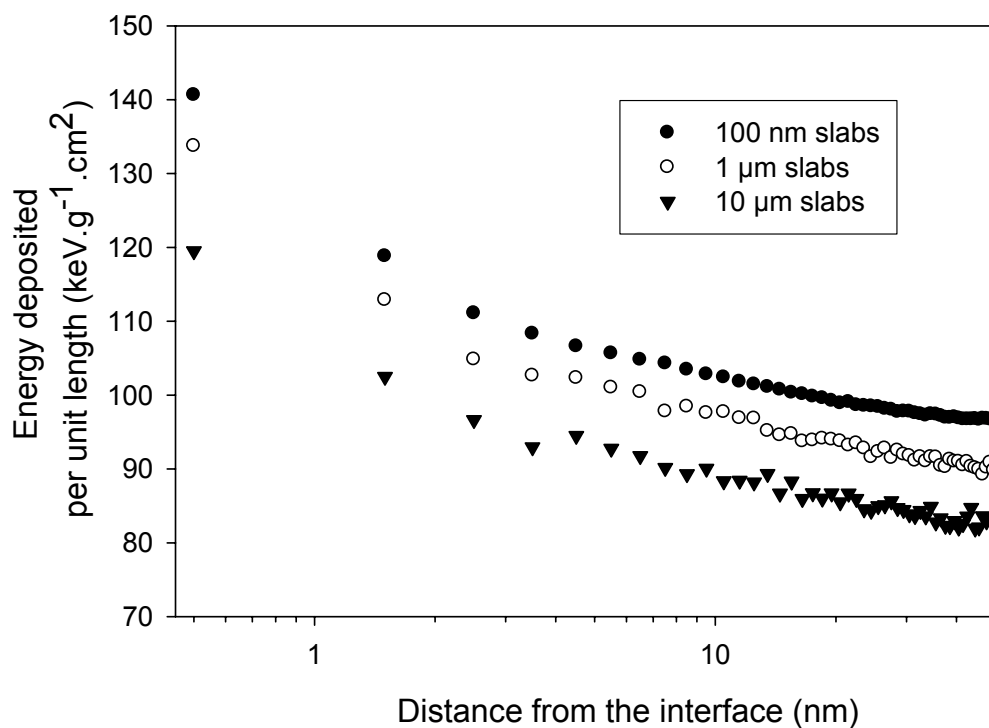

Figure S2: Energy deposited in water in the vicinity of a gold surface for three different types of geometry.

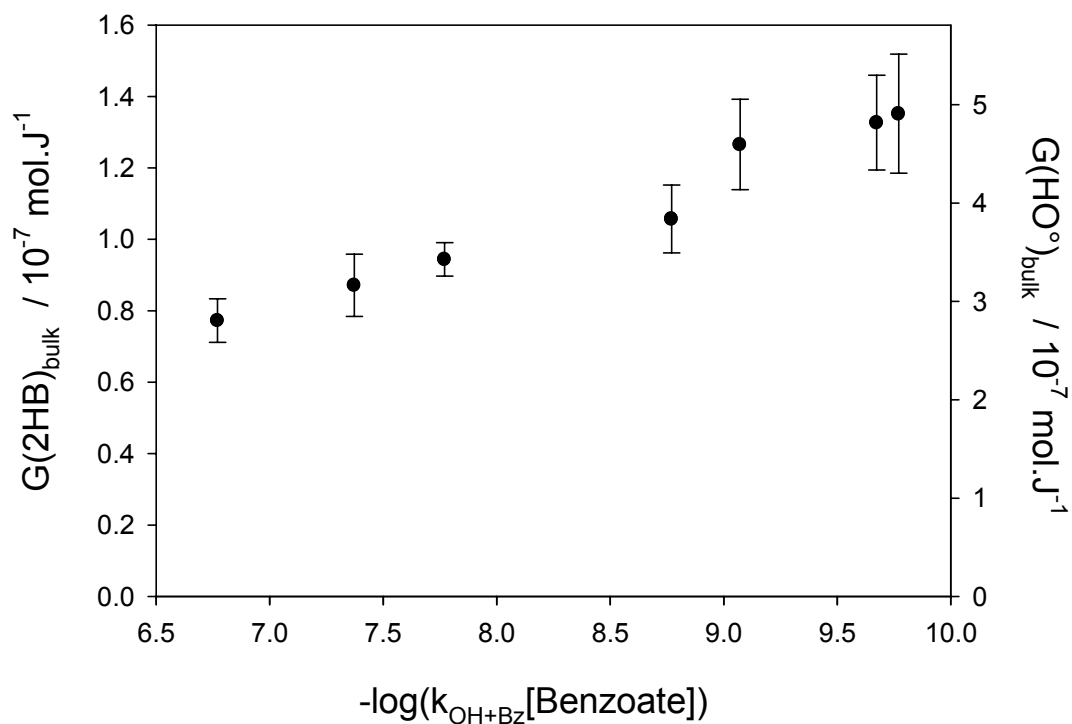

Figure S3: Evolution of the radiolytic yield of production of 2 hydroxybenzoate (2HB) as a function of the scavenging efficiency. The transposition of data in hydroxyl radical yields is presented as right axis.

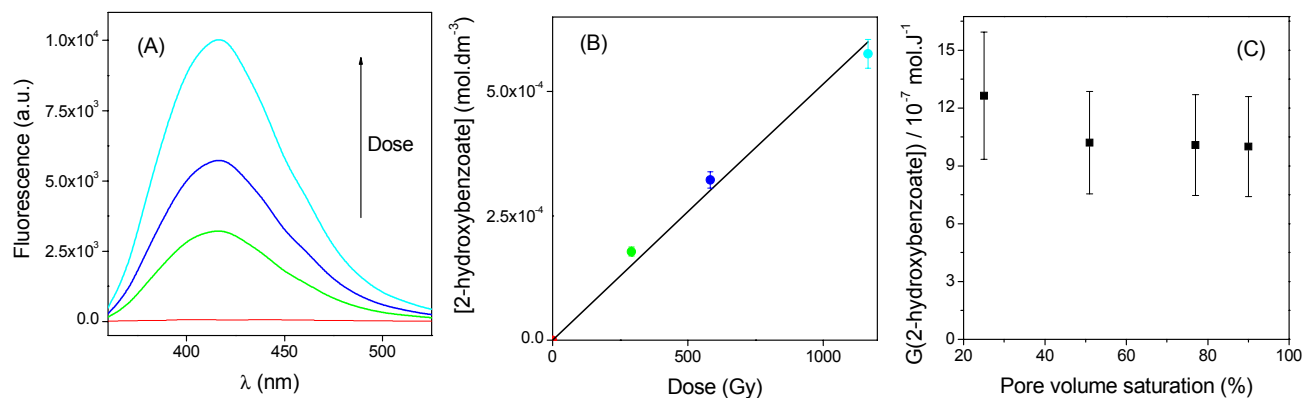

FigureS4: (A) *Emission spectra* ( $\lambda_{exc} = 300 \text{ nm}$ ) of the 2-hydroxybenzoate extracted from the porous gold samples and deduced (B) 2-hydroxybenzoate concentration after irradiation of confined  $0.1 \text{ mol.dm}^{-3}$  sodium benzoate solutions as a function of the dose (0 in red, 290 Gy in green, 583 Gy in blue 1166 Gy in cyan) (C) *Evolution of the 2-hydroxybenzoate radiolytic yields in  $1 \text{ mol.dm}^{-3}$  sodium benzoate solutions as a function of the pore saturation. The yields are calculated with respect to the dose received in water.*

Table S1.

| Glass     | Mean pore diameter (nm) | Pore distribution ( $\pm\%$ ) | Pore volume (cm <sup>3</sup> /g) | Specific area (m <sup>2</sup> /cm <sup>3</sup> ) |
|-----------|-------------------------|-------------------------------|----------------------------------|--------------------------------------------------|
| CPG00500C | 50                      | 2.5                           | 1.18                             | 49.5                                             |
